# Supplementary material for: Horizontal gene transfer of a bacterial insect toxin gene into the Epichloë fungal symbionts of grasses
Source: PubMed Central journal article supplement — Sci Rep. 2014 Jul 3;4:5562. doi: 10.1038/srep05562 (PMC4080199; doi:10.1038/srep05562), 2014-07-03
Supplement: srep05562-s1.pdf [file srep05562-s1.pdf]

## Supplementary Information

Horizontal gene transfer of a bacterial insect toxin into the *Epichloë* fungal symbionts of grasses

Karen V. Ambrose<sup>a</sup>, Albrecht M. Koppenhöfer<sup>b</sup>, Faith C. Belanger<sup>a,\*</sup>

<sup>a</sup>Department of Plant Biology and Pathology, and <sup>b</sup>Department of Entomology, Rutgers University, New Brunswick, NJ 08901

\*To whom correspondence should be addressed

Corresponding author:

Faith C. Belanger

Department of Plant Biology and Pathology

Rutgers University

59 Dudley Road

New Brunswick, NJ 08901

Telephone: 848-932-6389

Email: [belanger@aesop.rutgers.edu](mailto:belanger@aesop.rutgers.edu)

## Supplementary Figures

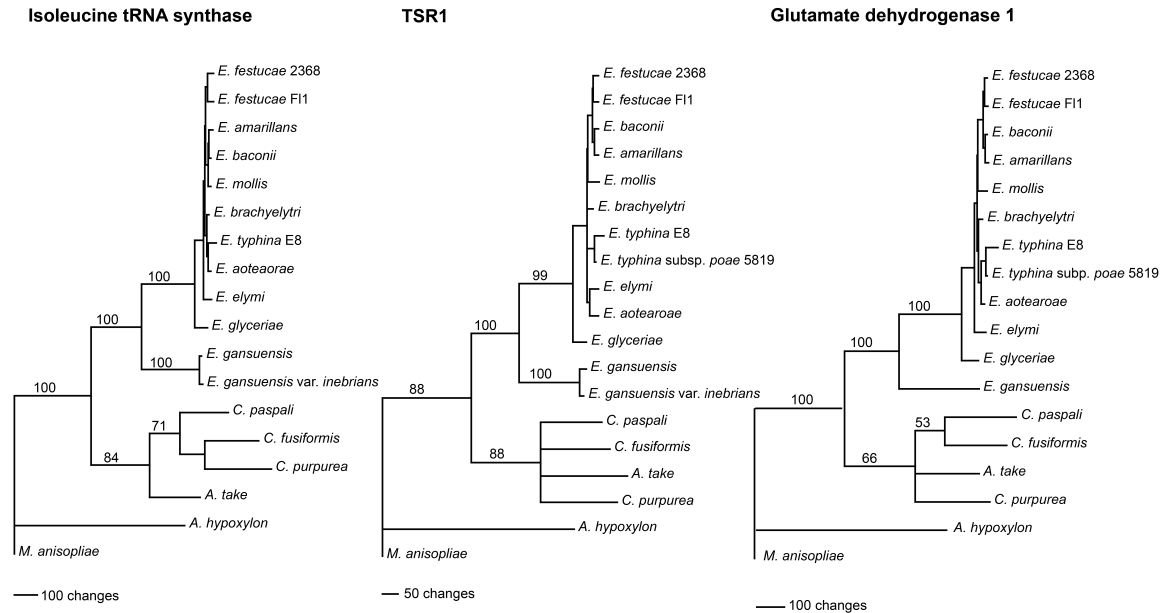

**Supplementary Figure 1.** Rooted 50% majority rule maximum parsimony phylogenetic trees of the glutamate dehydrogenase, isoleucine tRNA synthase, and TSR1 DNA coding sequences. The *Metarhizium anisopliae* sequences were designated as the outgroup for rooting the trees. The numbers at the nodes are the bootstrap percentages based on 1,000 replications. The TSR1 tree was based upon 2,538 total characters, of which 1,433 were constant, 478 variable characters were parsimony uninformative, and 627 variable characters were parsimony informative. The unmarked nodes all had bootstrap support of 53 or higher. The glutamate dehydrogenase tree was based upon 3,225 total characters, of which 1,967 were constant, 493 variable characters were parsimony uninformative, and 765 variable characters were parsimony informative. The glutamate dehydrogenase sequence from *E. gansuensis* var. *inebrians* was not included, since the gene sequence was split between two contigs, which introduced a gap into the alignment. The unmarked nodes all had bootstrap support of 66 or higher. The isoleucine tRNA synthase tree was based upon 3,228 total characters, of which 1,884 were constant, 517 variable characters were parsimony uninformative, and 827 variable characters were parsimony informative. The isoleucine tRNA synthase gene from *E. typhina* subsp. *poae* 5819 was not included since the gene was split between two contigs, which introduced a gap into the alignment. The unmarked nodes all had bootstrap support of 70 or higher.

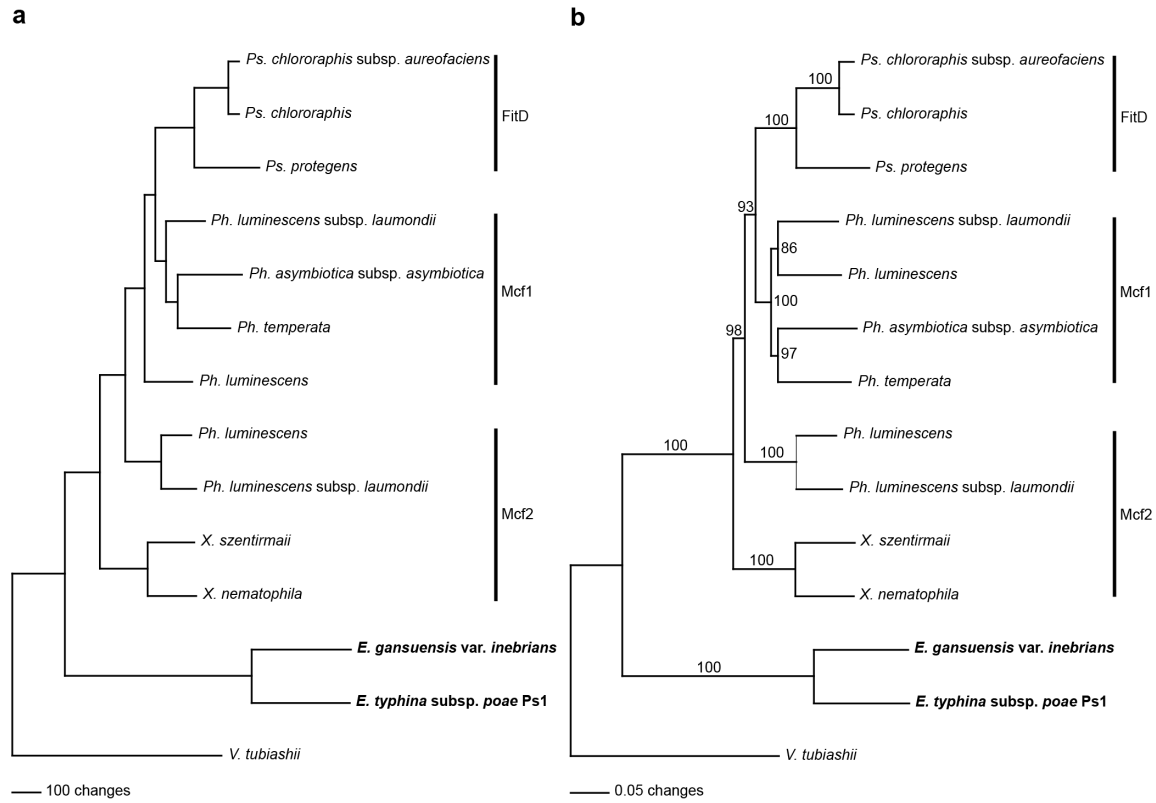

**Supplementary Figure 2.** Mcf phylogenetic trees generated by the branch and bound (a) and, neighbor joining (b) methods. The *Vibrio tubiashii* sequence was designated as the outgroup for rooting the trees. The numbers at the nodes of the neighbor joining tree are the bootstrap percentages based on 1,000 replications. The trees were based upon 1,983 total characters, of which 391 were constant, 404 variable characters were parsimony uninformative, and 1,188 variable characters were parsimony informative.

**Supplementary Figure 3.** Sequence alignment of the Mcf proteins used to generate the phylogenetic trees in Figure 4 and Supplementary Figure 2.

CLUSTAL X (1.83) multiple sequence alignment

```

Ps.c.aureofaciensAFD97973.1      VVTSLDANTFRVYHDGRVNSSL YDNVVMADV KDYQVAGTAEGLAAAYM
Ps.chlororaphisAFD97974.1      VVTSLDANTFRVYHDGRVNSSL YDNVVMADV KDYQVAGTAEGLAAAYM
Ps.protegensABY91230.1        VVTSLDATTYRVYHDGRVNSSL YDNVVMADV KDYQVAGTAEGLAAAYM
Ph.l.laumondiiNP_931332.1      VVTSLDNTYRVYHDGRFNSSL YDNVVMADV KDYQISDTAGGFAAAYM
Ph.luminescensAAM88787.1      VVTSLDANTFRVYHDGRVNSSL YDNVVMADV KDYQIAGTAEGLAAAYM
Ph.a.asymbioticaYP_003042199.1 VVTSLDNTYRVYHDGRVNSSL YDNVVMADV KDYQVSGTTEGLATAYM
Ph.luminescensMcf2AAR21118.1  VVTSLDANTYRVYHDGRVNSSL YDNVVMADV KDYQAAATTENLAVAYM
Ph.l.laumondiiMcf2NP_930360.1 VVTSLDANTYRVYHDGRVNSSL YDNVVMADV DDKYRVAATDSLAVAYM
Ph.temperataWP_023045049      IVTNLDANTYRVYHDGRINSSL YDNVVMADV KDYQVSGTVEGLAAAYM
X.szentirmaiMcf2CDL84642      VVTHLDNTYRVYHDGRVNSSL YDNVVMADV QDYQVAGTAEGLAAAYM
X.nematophilaMcf2YP_003712268. IVTKLNDNQYRVYHDSRMDSSML YDNVIMADV DWRDYKLRDGGGACAFM
E.g.inebrians                 IVTNLNDQYRVYHDSRQDSSLL YDDVVMADV RDYKHRDASTGFSTFM
E.t.poe                        IVTDLNDTHYRVFHDGRVGSV L YDNVVMADV ADYQGQGV SDEVAGAYM
V.tubiashiiEIF01430.1        .** *: .**:*.* .**:*:*.*:** *:* .* :**

Ps.c.aureofaciensAFD97973.1      QYVDGQWQLVFQRQEYQREGQ---MVWPKLRD---GAQPLAIQSADPQ
Ps.chlororaphisAFD97974.1      QYVDGQWQLVFQRQEYQREGQ---MVWPKLRD---GVQPLAIQTADPQ
Ps.protegensABY91230.1        QYVDGQWQLVFQRQEYQREGQ---MVWPKLRE---GAEPLSIQTADSQ
Ph.l.laumondiiNP_931332.1      QYVNGEWQLVFQRQEYQRDGG---MVWPKLRG---DVEPLSIQIAGSQ
Ph.luminescensAAM88787.1      QYVNHQWQLVFQRQEYQRDGG---MLRRLRLD---DEEPLSIQVADSQ
Ph.a.asymbioticaYP_003042199.1 QYVDGEWQLAFQRQEYQDGG---RVWPKLRD---GGEPLSILVADSQ
Ph.luminescensMcf2AAR21118.1  QYVNDQWQLALQRQEYQDGG---TLRRLKLRG---GEEPLSIQIADSQ
Ph.l.laumondiiMcf2NP_930360.1 QYVNDQWQLVFQRQEYQDGG---RLRKLKLRG---DEEPLSIQIADSQ
Ph.temperataWP_023045049      QFVNDKQWQLVFQRQEYQRDGG---RIWLKLRD---GAESLSIRDAGSQ
X.szentirmaiMcf2CDL84642      QYVDGEWQLVFQRQEYQREGH---MLWPKLRN---GEEPLSIQVADSQ
X.nematophilaMcf2YP_003712268. QYVNGEWQLVFQRQEYQRDGH---TLWPKLRS---NEEPLSIKTADSQ
E.g.inebrians                 HYREGIWSLYFQRQNQTKNGAFRTL YNARPKDVTYIIGAEP LIKLPKSY
E.t.poe                        HYREGRWSLCFQRQTIVAN-ARIVL YEPAPRDGPSILGAEPLIEMVPSY
V.tubiashiiEIF01430.1        IFKDGQWQLMLQRQEYIPHPDNPL LTTWVKRKG---ATGDVMIQRPNAI
: * . * .*** . . .

Ps.c.aureofaciensAFD97973.1      VVERNRAEFAAYREQVHQNLKKVATQFGVSV EGVADG--VYREGAFSP-E
Ps.chlororaphisAFD97974.1      VVERNRAEFAAYREQVHQNLKKVAAQFGVSV EGVADG--VYSEGAFSP-E
Ps.protegensABY91230.1        VQERNRTQFAEYREQVHQNLKKVATQFGVST EGVADG--VYSGGDFSP-E
Ph.l.laumondiiNP_931332.1      VVERNQAEFATYREQVHQQLKTVATQFGVSV EGVTDG--VYTEGEFSP-E
Ph.luminescensAAM88787.1      VVERNQAQFVAYREQIHQQLKKVATQFEVSI SGVSDG--VYTEGEFSP-D
Ph.a.asymbioticaYP_003042199.1 VGQHNQGEFATYREQIHQQLKKVATQFGVSV EGVADG--VYTEGEFSP-E
Ph.luminescensMcf2AAR21118.1  VIERNQAQFATYREEIHQQLKKVAAQFGVSV EGIADG--VYREGFSL-D
Ph.l.laumondiiMcf2NP_930360.1 VTERNQAQFATYREQVHQQLKKVATQFGVSV EGIADG--VYTEGEFSP-D
Ph.temperataWP_023045049      VVEGKQVEFATYREQVHQQLKKVATQFGVSV EGVADG--VYTEGAFSP-E
X.szentirmaiMcf2CDL84642      VTAHNQAQFSDYREKIHQKLKEVAAQFGI PAEGISDG--IYKEGEFSP-H
X.nematophilaMcf2YP_003712268. VTAHNQAQFSDYREKIHQKLKEVAAQFGI PAEGISDG--VYEEGEFSS-H
E.g.inebrians                 NPNLVQSRFNE SRNQNRERLQDFHMTLFGHRYQGV DGEFTPFENNIKLN
E.t.poe                        NRELVQSRFEQSREKLERLRDARTKLSNDP PFQGEDGFQPFENRISLD
V.tubiashiiEIF01430.1        DDQARVEAFRQERTLAQGRLLTDAKALGLSVE PLPQDQDYQTGS SLLKVDE
* * .* : : .

Ps.c.aureofaciensAFD97973.1      HPAIAAWNQLREAVQAKVNADIQQLADKRYQL QQDR-----RGASD--
Ps.chlororaphisAFD97974.1      HPAIASWNQLREAVQAKVNADIQQLADKRYQL QQDR-----RGASD--
Ps.protegensABY91230.1        HPAIAAWNRLRDVAQAKVSADIEQLGNQRYQL QEQR-----RGASD--
Ph.l.laumondiiNP_931332.1      HPAIAAWTRLREAVQAKVKANMDPVADKLYQL QQAR-----RTSSD--
Ph.luminescensAAM88787.1      HPAIAAWAKLCAEVYDRINADTKQLVDKRNKLY ENR-----RNTIR--
Ph.a.asymbioticaYP_003042199.1 HPAIAAWTRLREAVQAKVKADIDQVAGKHQQL QEAR-----RTSSD--

```

Ph.luminescensMcf2AAR21118.1  
Ph.l.laumondiiMcf2NP\_930360.1  
Ph.temperataWP\_023045049  
X.szentirmaiiMcf2CDL84642  
X.nematophilaMcf2YP\_003712268.  
E.g.inebrians  
E.t.poae  
V.tubiashiiEIF01430.1

HPAIAAWTKLRTEVYDRINTDTKQLTNKRDKLYEER-----RTSSR--  
HPAIAAWTKLHAEVDDKINADIKQLVDKRSKLYEEQ-----RNTSQ--  
HPAIAAWTRLREAVQAKVKTDIDQMEGKRYQLQEAR-----HTSSD--  
HSAIAAWIGLRDVKQDKITADTQQLVDKRSPLYQLR----NSTRDSAK--  
HSAIAAWIGLRDQVQAKITADTQQLVNQRSDLYQIR----NRTRDSGQ--  
NPAVLSQGLREALKGNTSWPAELGAELNVQVLVPLT-----D  
NEAVRYSQRLRADLH-DLMKDRRHDRDHPGDDMAFS-----A  
NPALAQWQDLRNALKQKTDEELAPLLERKSVLFAKL---RKATGERKQ--  
: \* : :

Ps.c.aureofaciensAFD97973.1  
Ps.chlororaphisAFD97974.1  
Ps.protegensABY91230.1  
Ph.l.laumondiiNP\_931332.1  
Ph.luminescensAAM88787.1  
Ph.a.asymbioticaYP\_003042199.1  
Ph.luminescensMcf2AAR21118.1  
Ph.l.laumondiiMcf2NP\_930360.1  
Ph.temperataWP\_023045049  
X.szentirmaiiMcf2CDL84642  
X.nematophilaMcf2YP\_003712268.  
E.g.inebrians  
E.t.poae  
V.tubiashiiEIF01430.1

KGLIDQIKQLNLTQDYRAQYDPVLRREAGSVEKTWLWQIQKAKEGSAAV  
KGLIDQIKQLNLTQDYRAQYDPVLRREAGSVEKTWLWQIQKAKEGSAAV  
KSLIDQIKQLNLTQDFYRAQYEPVLRREASVEKTWLWQIQAKQGSAAV  
TALIDQIKQLNLTQDYRAQYDPILRREASSVEKTWLWQIQKAKDGSVAV  
RDLINQIKQLNLTLEYKAQYDVTLRREAGFVEQSWLWQIQKAKNGSAAV  
TALIDQIKQLNLTQDYRAQYDSVLRREADFVEKAWLWQIQKAKDGSAAV  
HDLIDQIKQLNLTLEYKAQYDVTLRREASFVEQSWLWQIQKSRDGMMAV  
HNLIDQIKQLNLTLEYKAQYNTVLRREAGFVEQSWLWQIQKSKDGMMAV  
TALIDQIKQLSLTQDYRAQYDPVLRREAVAVENTWLWQIQKAKEGSAV  
LAFIDQIKQLNLTDFYKEQYDSVLRREVFSVEQSWLWQIQKSKNGMDAV  
LVLIDQIKQLNLTLEYKAQYDVTLRREVFSVEQSWLWQIQKSRNGIDAV  
RWLQSDRFLKLFASKYFFDQIK---KSEKYDYTYLWLKQKERRGFAAV  
QWLVSLLGDQLFLN-ERFVGRAV---ASSRNYDFTYLWLKQKEERGFTAV  
--HLQAQIDAINATKAFYQSYLDGIDKSIDMDRLWLWLEKKDREGVSSV  
. : : . : \*\* : . \* : \*

Ps.c.aureofaciensAFD97973.1  
Ps.chlororaphisAFD97974.1  
Ps.protegensABY91230.1  
Ph.l.laumondiiNP\_931332.1  
Ph.luminescensAAM88787.1  
Ph.a.asymbioticaYP\_003042199.1  
Ph.luminescensMcf2AAR21118.1  
Ph.l.laumondiiMcf2NP\_930360.1  
Ph.temperataWP\_023045049  
X.szentirmaiiMcf2CDL84642  
X.nematophilaMcf2YP\_003712268.  
E.g.inebrians  
E.t.poae  
V.tubiashiiEIF01430.1

VRTDDTAIQGGGAERASSVGERYAIAEAYQRGARGTAFSDGLRDFREIKI  
VRTDDTAIQGAGEERASSVGERYAIAEAYQRGARGTAFSDGLRDFREIKI  
VRTDDTAIQGGGDERSTSVGERYAIAEAYHRGARGTAFSDGVRDFREIKI  
VQIDDTAIQ--GEERTSSVGERYAASEVYQRGAGTGFNDGLRNFREIKI  
VRIDDTAIQGGGQRTDSVGERYAIAEAYQRGARGTGFSDGLRNFREIEI  
VRIDDTAIQ--GGKRTSSVGERYAIAEAYQRGVLTAFAYGLQNFREINI  
VRIDNTSMQNSGPEHTSSVGERYAIAEAQHNVHGTAFSTNGQRHFRDINI  
VRIDNTPIQNSGLEHTSSIGERYVIADAYQHRVHGTAFSTGQRNFRDISI  
VRIDDTTIQ--GEEHTSSVGERYAAAAYQRGKQGTGFRDGLRNFREIKI  
LQINDTAIQGGGQEHNLSLGERYAIAEAYQRRETPPEFIDGLRHFQDVSI  
LQINDTAIQGGGQDRNLSLGERYVIAEAYQRREANPELIDGLRNFQDVSI  
VREGEHRQAP----LGGTAGERLSEQRFRASLAGDNFSTGYKTYGSVEI  
VREGEHRQTP----LGGTAGQRLSEQRFRELAGDNFSSGYNAYESVEI  
IAID-AHLKASPNQRLVDQYNTQKQALESLKGQRGDDYLFGKSNSQDIEV  
: . : \* : : :

Ps.c.aureofaciensAFD97973.1  
Ps.chlororaphisAFD97974.1  
Ps.protegensABY91230.1  
Ph.l.laumondiiNP\_931332.1  
Ph.luminescensAAM88787.1  
Ph.a.asymbioticaYP\_003042199.1  
Ph.luminescensMcf2AAR21118.1  
Ph.l.laumondiiMcf2NP\_930360.1  
Ph.temperataWP\_023045049  
X.szentirmaiiMcf2CDL84642  
X.nematophilaMcf2YP\_003712268.  
E.g.inebrians  
E.t.poae  
V.tubiashiiEIF01430.1

PGVDDRMSALEMKRLFLEG--TLSPRREGALSGRITETAQAEYIDKVLKQ  
PGVDDRMSALEMKRLFLEG--TLSPRREGALSGRITETAQAEYIDKVLKQ  
PGLDDKMSALEMKRLFLEG--QLTPGQRGALSARISSETSQAQYIDKVLKQ  
PGVDDKMSALEMKRRFLEG--KLTHEQREALSARIAEISQAQYIDKVLKQ  
PGVDDKMSALEMKRLFLEG--KLTSEQGALSAGRITETSQAQYIDKVLKQ  
PGVDDKMSALEMKRLFLEG--KLTSEQGALSAGRITETSQAQYIDKVLKQ  
PGVDDKMSALEMKRLFLEG--KLTSEQGALSAGRITETSQAQYIDKVLKQ  
PGLYDRMSALEMKSLFLKG--QLTPEQQGALSVAHITETSQAQYIDKVLKQ  
PGMYDRMSALEMKILFLKG--QLTPKQGSALSAHITETSQAQYIDKVLKQ  
PGVDDKMSALEMKRLFLEG--KLTDEQRGALSAGRITETSQAQYIDKVLKQ  
PGFDDRMSTLEMKDLFFDS--QLTPKQRGALVGRITKASQAQYIDKVLKQ  
PGFDDRMSALEMKGLFFGS--QLTPKQRGALISRITQASQAQYIDKVLKQ  
SGYTHDMTLEMKILFDRSSTSLTQTEQGALLRRIELARKDLFNESVWQK  
PGYEHDMTLEMIVQLFDRSSTSLTQTEQGALLRRIDLARKDLFNESIWMQ  
PGYHQGMKALDMIRLMFDDSHQLTFKQKQALVAHIKQFQQTMRFALDK  
. \* . . : : \* : : \*\* : \* :

Ps.c.aureofaciensAFD97973.1  
Ps.chlororaphisAFD97974.1  
Ps.protegensABY91230.1  
Ph.l.laumondiiNP\_931332.1

TAVFSEDFHKGASVFDRLAPQDFYLSLVGDRSGGRCYPLVRAMAVALASG  
TAVFSEDFHNAGSVFGQLAPQDFYLSLVGDRSGGRCYPLVRAMAVALASG  
TATLSEDFRAGSVFGQLAPQDFYLSLVGDRSGGRCYPLVRAMAVALARG  
TAMFSEDFHDAGSVFNRLVPQDFYLSLVGDRSGGRCYPLVRAMAVALASG

Ph.luminescensAAM88787.1  
Ph.a.asymbioticaYP\_003042199.1  
Ph.luminescensMcf2AAR21118.1  
Ph.l.laumondiiMcf2NP\_930360.1  
Ph.temperataWP\_023045049  
X.szentirmaiiMcf2CDL84642  
X.nematophilaMcf2YP\_003712268.  
E.g.inebrians  
E.t.poa  
V.tubiashiiEIF01430.1

Ps.c.aureofaciensAFD97973.1  
Ps.chlororaphisAFD97974.1  
Ps.protegensABY91230.1  
Ph.l.laumondiiNP\_931332.1  
Ph.luminescensAAM88787.1  
Ph.a.asymbioticaYP\_003042199.1  
Ph.luminescensMcf2AAR21118.1  
Ph.l.laumondiiMcf2NP\_930360.1  
Ph.temperataWP\_023045049  
X.szentirmaiiMcf2CDL84642  
X.nematophilaMcf2YP\_003712268.  
E.g.inebrians  
E.t.poa  
V.tubiashiiEIF01430.1

Ps.c.aureofaciensAFD97973.1  
Ps.chlororaphisAFD97974.1  
Ps.protegensABY91230.1  
Ph.l.laumondiiNP\_931332.1  
Ph.luminescensAAM88787.1  
Ph.a.asymbioticaYP\_003042199.1  
Ph.luminescensMcf2AAR21118.1  
Ph.l.laumondiiMcf2NP\_930360.1  
Ph.temperataWP\_023045049  
X.szentirmaiiMcf2CDL84642  
X.nematophilaMcf2YP\_003712268.  
E.g.inebrians  
E.t.poa  
V.tubiashiiEIF01430.1

Ps.c.aureofaciensAFD97973.1  
Ps.chlororaphisAFD97974.1  
Ps.protegensABY91230.1  
Ph.l.laumondiiNP\_931332.1  
Ph.luminescensAAM88787.1  
Ph.a.asymbioticaYP\_003042199.1  
Ph.luminescensMcf2AAR21118.1  
Ph.l.laumondiiMcf2NP\_930360.1  
Ph.temperataWP\_023045049  
X.szentirmaiiMcf2CDL84642  
X.nematophilaMcf2YP\_003712268.  
E.g.inebrians  
E.t.poa  
V.tubiashiiEIF01430.1

Ps.c.aureofaciensAFD97973.1  
Ps.chlororaphisAFD97974.1

TAVFSEDFHDAGSVFDRLVPQDFYLSLVGDRSGGRCYPLVRAMTVALASG  
TAVFSEDFHDAGSVFNRLVPQDFYLLLVGDRSGGRCYPLVRAMAVALLASS  
TAVYSEDFHRAGSSFDRLLAPQDFYLSLVGDKSGGRCYPLVRAMAVALLANN  
TAVYSEDFHRAGSSFDRLLVPQDFYLSLVGDKSGGRCYPLVRAMAVALLANS  
TAVFSENFHDAGSVFERLVPQDFYLSLIGDQSGGRCYPLVRTMAVALASG  
TAVFSEDFQRAGSISSQLVPQDFYLSLVGDVSGGRCYPLVRAMAVALLSGN  
TAVFSEDFQLAGSISSHLVPQDFYLSLVGDVSAAGRCYPLVRAMAVALLASS  
TNDVIAMFQEMGGSTKMPQDILLRAVPDEHGGGRCYPLVYAMSVALASS  
TNDVVAMFQEMGGYTKMPQDILLNAIPDKYGGGRCYPLVYAMSVALASS  
SAEVSRYMTAQGAFVTLVPQDFVLLGRP----GRCLPLSRVMATAIAQK  
: : \* : : : \*\* \* . : . \* : :

G---EAGVNSLVQKFLASADPQA--GSSTLLKNSLIRLHSN-VEAVQAS  
G---EAGVNSLVQKFLASADPQA--GSSTLLKNSLIRLHSN-VEAVQAS  
G---EAGVNSLVQKFLASADPQA--GISTLLKNSLIRLHSN-VDAVHAS  
G---EAGINSLVQKFLFASADPQA--GSSTLLKNSLISLHYN-VEAVQAS  
G---EAGINSLVQKFLFASADPQA--GSSTLLRNSLIRLHSN-VEAVQAS  
G---ETGINNLLVQKFLFASADPQA--GGSTLLKNSLIRLHSN-VEAVQAS  
G---ETGINSLVEKFLFAAADPHA--SSSTLLTNSLIRLHSNNVEAVQAS  
G---EAGINLLVEKFLFAAADPHA--GSSTLLKNSLIRLHSNLEAVQAS  
G---EAGIDSLVQKFLFASADPQA--GSSTLLKNSLIRLHSN-VEAVQAS  
G---EVGVNSLVEKFLFAAASPQE--GSSTLLKNSLIRLHSN-VEAVQAS  
G---EAGINSLVEKFLFAAASPQE--GSSTLLKNSLIRLHSN-VEAVQAS  
DFAIDFVIDQLCAKLVALSPNNKSDMMNAELKRCLEDLHTS-YPAEAS  
----NFAIDALCAKLVGLSPNNAADMKNAELKRCLEDLHTS-YPAEAS  
G---EPGANQFASVLFDAAAHPDS--QIATNVYTTVGQLHSN-TDAGLAE  
: : : \* . : . : : : \*\* . \* \* .

RELQGVKLVSEVVSRLAA----SSGTSMFALNTQNHSMMVGSQTAEGRRY  
RELQGVKLVSEVVSRLAA----STGTSMFALNTQNHSMMVGSQTAEGRRY  
KALGQFQLSDVVARLAN----GSSDSMFALNTQNHSMMVGSQTAEGRRY  
TELQGFNLSEVVSRLAA----TTGTSMFALNTQNHSMMVGSQTAEGRRY  
TELQGFGLSEVVSRLAA----TTGTSMFALNTQNHSMMVGSQTAEGRRY  
TKLGLSNLSEVVSRLTT----TAHTAMFALNTQNHSMMVGSQTAEGRRY  
TARGQVKLVSEVVSRLKGG----ATKTSMFALNTQNHSMMVGSQTAEGRRY  
TTRGQVTLSEVVSRLKGG----ATKTSMFALNTQNHSMMVGSQTAEGRRY  
TDLGQFNLSEVVSRLDT----TTSTSMFALNTQNHSMMVGSQTAEGRRY  
TARGQVTLPEVVSRLKE----SAGTSTFALNTRNHAMMVGTVGAEGRRY  
TVRGQVTLSETVVSRLKE----SAGTSTFALNTRNHAMMVGTVGAEGRRY  
RPIGNMTEEAIVSILEK----STETTLAMHTEVHAML LGVTRTGNSTLW  
RPIGNMTEEAIVSILEK----STETTLAMHTEVHAML LGVTRTGNSTLW  
TDAGRLSFKGIVSNLEKESLTNGSSKFLMNTRAHSMVLGKRFEGKSRY  
\* : : \* : : \* \* : : \* : :

YFYDPNVGIFAFDSTKALSKAMQQHLVERKLAHYGSFGSQSPAFNLIE  
YFYDPNVGIFAFDSTKALTKAMQQHLVERKLAHYGSFGSQSPAFNLIE  
YFYDPNVGIFAFDSSKGLAKAMEQHLVRRKLAHYGSFGSQSPAFNLVE  
YFYDPNVGIFAFDNTKSLSRAMEQHLVVRGLAAHYGSFGSKSVPFNLIE  
YFYDPNVGIFAFDNTKSLSRAMEQHLVGRRLAVHYGSFGSKSVPFNLIE  
YFYDPNVGIFAFDNTKNL FNAMEKHLVERNLAVHYGSFGSQSPAFNLVE  
YFYDPNVGIFAFNDVAVFFRAMKNHLVGRKLAHYGSFGDLTPIFNLVE  
YFYDPNVGIFAFNNTSRFLEAMKHHLVGRKLAHYGSFGDLTPIFNLVE  
YFYDPNVGIFAFDNPKSLFRAMEQHLVESNLTAHYGLFGSNAPAFNLIE  
YFYDPNVGIFAFDNNVFNFSHAMEKHLVTRKLAHYGAFGSKSTPAFNLVE  
YFYDPNVGIFAFDNMKNFSRAMEKHLVERKLAHYGALGSKSTPAFNLVE  
HFYDPNFIAITFNSGEALLEATTKFFEESGFYAKVYEAQG--QTPSDFIFQ  
HFYDPNFIAITFNSGEALLEATTKFFEESGFYAKVYEAQG--QTPSDFIFQ  
FFYDPNFIAITFNSGEALLEATTKFFEESGFYAKVYEAQG--QTPSDFIFQ  
FFYDPNFIAITFNSGEALLEATTKFFEESGFYAKVYEAQG--QTPSDFIFQ  
.\*\*\*\*\*.: \*.: : : : : : \* \* \* \* : .

IDTGKMAEVPVGNLNVADLSRPEELAGVIGQRRQVEQAVDAQQRVSEDL  
IDTGKMAEVPVGNLNVADLSRPEELAGVIGQRRQVEQAVDAQQRVSEDL

Ps. protegensABY91230.1  
Ph.l.laumondiiNP\_931332.1  
Ph.luminescensAAM88787.1  
Ph.a.asymbioticaYP\_003042199.1  
Ph.luminescensMcf2AAR21118.1  
Ph.l.laumondiiMcf2NP\_930360.1  
Ph.temperataWP\_023045049  
X.szentirmaiiMcf2CDL84642  
X.nematophilaMcf2YP\_003712268.  
E.g.inebrians  
E.t.poeae  
V.tubiashiiEIF01430.1

Ps.c.aureofaciensAFD97973.1  
Ps.chlororaphisAFD97974.1  
Ps.protegensABY91230.1  
Ph.l.laumondiiNP\_931332.1  
Ph.luminescensAAM88787.1  
Ph.a.asymbioticaYP\_003042199.1  
Ph.luminescensMcf2AAR21118.1  
Ph.l.laumondiiMcf2NP\_930360.1  
Ph.temperataWP\_023045049  
X.szentirmaiiMcf2CDL84642  
X.nematophilaMcf2YP\_003712268.  
E.g.inebrians  
E.t.poeae  
V.tubiashiiEIF01430.1

Ps.c.aureofaciensAFD97973.1  
Ps.chlororaphisAFD97974.1  
Ps.protegensABY91230.1  
Ph.l.laumondiiNP\_931332.1  
Ph.luminescensAAM88787.1  
Ph.a.asymbioticaYP\_003042199.1  
Ph.luminescensMcf2AAR21118.1  
Ph.l.laumondiiMcf2NP\_930360.1  
Ph.temperataWP\_023045049  
X.szentirmaiiMcf2CDL84642  
X.nematophilaMcf2YP\_003712268.  
E.g.inebrians  
E.t.poeae  
V.tubiashiiEIF01430.1

Ps.c.aureofaciensAFD97973.1  
Ps.chlororaphisAFD97974.1  
Ps.protegensABY91230.1  
Ph.l.laumondiiNP\_931332.1  
Ph.luminescensAAM88787.1  
Ph.a.asymbioticaYP\_003042199.1  
Ph.luminescensMcf2AAR21118.1  
Ph.l.laumondiiMcf2NP\_930360.1  
Ph.temperataWP\_023045049  
X.szentirmaiiMcf2CDL84642  
X.nematophilaMcf2YP\_003712268.  
E.g.inebrians  
E.t.poeae  
V.tubiashiiEIF01430.1

IDTHKMAEVPVGSGLNVADLSRPEELAGVIGQRRQVEQAVGAQQRVSDQL  
IDTRKMAEVPVGNGLNVADLTRFEELASVIGQRRQVEQVMSAQERITEDL  
IDTGKMAEVPVGNGLNVADLTRFEELSSVIGQRRQVEQVMSAQERITEDL  
IDTGKMAEVPVGNGLNVADLTRFEELASVIGQRRQVEQAVRAPERVTEDEL  
IDTGKMAKVPVGNGLNVADLTRPDELTTVIEQRRQVEQAVNAQVRIAKDA  
IDASKMAKVPVGNGLNVADLTRPDELTTVIEQRRQVEQAVNTQVRIAKDT  
IDTGKMAEVPVSNGLNVADLTRFEELASVIGQRRQVEQTVSTQERVTEDEL  
IDPAKMAKVPVGNGLDVADLTRPDELATVIEQRQWAKQVNTQEKVAEST  
IDPVKMARVPVGNGLDVADLTRPDELATVIEQRQWVKQTINAQEKIADKV  
IDAERVSGIILDYNTLVADLVRPETLLETVASQQQTATFLQDPAQLTASD  
IDAERVSRIGFDHNLTVADLVEPDTLLETITADRKTVTLYHDPAPQLTSSR  
LDTAKMAEVRSLTGLSVQDLASPSDRVANLATADHAARLAQASDLSLSTDL  
:\* . : : . . \* \* \* \* . : . : .

RLGAALTTFDAEQWG-ARFEVASTRLAREHQLGSQWIPPIIANIEEQKE-G  
RLGAALTTFDAEQWG-ARFEVASTRLAQEHQLGSQWIPPIIANTEELKD-G  
RLGAALTTFDAEQWG-ARFDAASTRLAREHQLSSQWIPPIIANterQPE-G  
RLSPALKTFDAEQWG-ARFEVASARLAQEHQLDSRWLPIIATTEDEQGE-G  
QLSTALQAFDAEQWG-ARFEAASTRLAQEHQLDSRWLPIIATTEEQGE-G  
RLSTLLKTLDAEQLG-GRFEVASTQLAQEYQLDSHWLPIIATTEELGE-G  
RLHTALATLDAEQWG-ARFAEASTRLAQENNLQQRWMPVISNTEDQGE-G  
RLHTALATLDAEQWG-SRFAEASTRIAQENNLQQRWMPVIGNTEDEQGE-G  
PLGTALKTFDAEQWG-ARFEAASTRLAQKYQLDNHWLPIIATTKDLGE-G  
QLRTALVTLDAELWG-ERFDNAITELARENGLDQRWMPVIDNIKEQDE-G  
QLHTALVTLDAEQWG-EKFDKAITELAGEHKLQQRWMPVIDNIKEKSE-G  
AFSAQTELLLETLGLGAAWRDARLEESTGMGEHWMPILETMREGDEKG  
TFSAQTELLLETLRLGAAWRDARLEESLGI GEHWMPILETLKEGGEEG  
QLKSALSVLQGANLA-QDFFAAAQDVYRRHRLDHAWVVPFENIEKTPS-G  
: . : : . : \* : : . \* : : . . . \*

GYRVQFINREQPE-QTRWLATDDGTFVEFRRFVDEHMRVFNQHTLEHGQ  
GYRVQFINRDQPELQPRWLDTRDGTVEFRRFVDEHMRVNEHFTLEHGQ  
GYRVQFINRDQPE-QTRWLSTDDGTFVEFRRFVDEHMSVLNEHFTLEHGQ  
RYRVQFINRDQPE-QTRWLITSDSTFVEFRRFIDEHMAVLNEHFTLEHGR  
RYRVQFINRDQPE-QTRWLDTDDSTFVEFRRFVDEHMSVLNEHFTLESGR  
HYRVQFINSDQPE-QTLWLTDDSTFVEFRRFVDEHMRVNEHFTLENGR  
RYRVQFINRDQPE-ETRWSSGDSTFIEFRRFVDEHMLTSLQHTFEHGQ  
HYRIQFINRDQPE-ETRWSSGDSTFIEFRRFVDEHMLTSLQHTFEHGQ  
RYQIQFINRDHPE-QTRSLDTNDSTFVEFRRFVDKHMSVLNEHFTLEHGR  
PYRIQFINRDNLE-EM-WINSDDSTFIEFRRFIDEHMRVNEHFTLERGQ  
GYRVQFINRDNLE-EK-WVNSNDGTFVKFRHFIDEHMRVNEHFTLERGQ  
SYEVQFINLKNKN-ETKWLSTKSPAIKDFKARLDKHLKSLSEYEFESGS  
SYEVQFINLKNMN-ETKWISTESSAIKDFKARLDEHLETLSKTHEFESGS  
QYRIPLIHREDNR-EISVLTSD-EK-WVNSNDGTFVKFRHFIDEHMRVNEHFTLERGQ  
\* : : \* : . . : : . . : \* : : : : . . . \*

IRPRAGVSEASVPDGLNAGFAVQTLIQWFADKNRKDTAQGTVPDLALAL  
IRPRAGVSEASVPDGLNAGFAVQTLIQWFADKNRKDTAQGTVPDLALAL  
IRPRGGVGEVAHVVDGLNAGFAVQTLIQWFADKNRKDAAGVSPDLALAL  
MRLRGGVGEAAPVDGLNAGFAVQTLIQWFADKNRHDAASGVSPDLALAL  
MQLRRGVSEVAPVDGLNAGFTVQTLIQWFADKNRHDAASGVSPDLALAL  
IRPKSGISEAAPVDGLNAGFAIQTLIQWFADKNRNDAARGIASPDLALAL  
IQPKGGIGEAPVDGLNAGFAIQSLIQWFTDKNRNDAARGIASPDLALAL  
MRLRGGVSEAMPVDGLNAGFAVQTLIQWFADKNRHNVASGVSPDLALAL  
IQHNGGVGEAAPVDGLNAGFAVQTLIQWFANKNRNDAAGVSPDLALAL  
MRHKGGVGEAAPVDGLNAGFAVQTLIQWFANKNRNDAAGVSPDLALAL  
FMRKENLPHAEADGLNAMSIVQTLIEHFSSK---ETEESKTNVQLADAL  
FMREENLAHAEADGLNAMFIMRTLIEHFAGK---KTEESKTNVQLADAL  
LTRHASITDVEHVDGLNAFAVQAILSWFNNHSRTAAAGDPLPQGLNTAL  
: . . : : \* : : : : . . . \* : : . . \* \* \*







E.g.inebrians  
E.t.poa  
V.tubiashiiEIF01430.1

EYNIHGVGANYTIGLNPVAMTLSS-----NKSSTRWVLDGK  
EYTIHGAGANYTIGLNPVAILSS-----GWSNTCWVLDGK  
HYAFNGKGGYHISLQSGASLSLQV-----TSRRDRS----TRWILDARQ  
\* ::\* \*..\* :.\*: .. : \* : :\*: \* :

Ps.c.aureofaciensAFD97973.1  
Ps.chlororaphisAFD97974.1  
Ps.protegensABY91230.1  
Ph.l.laumondiiNP\_931332.1  
Ph.luminescensAAM88787.1  
Ph.a.asymbioticaYP\_003042199.1  
Ph.luminescensMcf2AAR21118.1  
Ph.l.laumondiiMcf2NP\_930360.1  
Ph.temperataWP\_023045049  
X.szentirmaiMcf2CDL84642  
X.nematophilaMcf2YP\_003712268.  
E.g.inebrians  
E.t.poa  
V.tubiashiiEIF01430.1

LESDSISVSKD----QMVG---VVVKLDPASNGQVLLVNAKGEVREV  
LASESISVSKG----QLVVG---VVVKLDPEPNGVLLVNAKGEVREV  
LESDSITVAKD----HLLVGG---VKVRLDPAQSGQVLLVNAKGEVRAA  
LASDSISVSKN----QLVVG---VVVELDPTQNGQVLLVNGKGEVREV  
LASDSISVSKD----QLLVGEGKGEVVVKLYLAQNSQVLLVNGKGEVRKV  
LASNGISVSKN----QLVFG---VVVELDPVKNKSVSVVN--KGMHV  
LASDSISVSKN----RLVVG---MAVELSDWKEQVLLVNRKGEVREV  
LASDSISVSKN----RLVVG---VVVELSDRKEQVLLVNCCKGEVREV  
LDNDNIKVSKNPLENQLIEIG---VVVKLDLTQNRQVSVVNGKGEVRKV  
LSDSTIKVTKN----RLEIG---VVVELDPSQNGQVLLVNSNNEVREI  
LDNGTIKVLN----RLEIG---VVVEIDPSRNGQVLLVNSKNEVHEI  
LDGEDIMVEAQ----AVSILG---FRVNLADRNFESMFICKPNGEILQV  
LDGENIVIEAR----AVSISG---FRVNLADTLFSSMLIYKPNGEILEV  
LSSDHLVTRD----HLNIG---VRVNLPLGLSWGSIIVINKHNEVLVV  
\* . : : : . : . \*.: : : : :\*:

Ps.c.aureofaciensAFD97973.1  
Ps.chlororaphisAFD97974.1  
Ps.protegensABY91230.1  
Ph.l.laumondiiNP\_931332.1  
Ph.luminescensAAM88787.1  
Ph.a.asymbioticaYP\_003042199.1  
Ph.luminescensMcf2AAR21118.1  
Ph.l.laumondiiMcf2NP\_930360.1  
Ph.temperataWP\_023045049  
X.szentirmaiMcf2CDL84642  
X.nematophilaMcf2YP\_003712268.  
E.g.inebrians  
E.t.poa  
V.tubiashiiEIF01430.1

DFA---GMSARVVEEDASKWQLPGQRIEQHSELAKAHQLHGQYVVVDNY  
DFA---GMSARVVEEDASKWQLPGQRIEQHSELAKAHQLHGQYVVVDNY  
DFA---GQTTYVVKEDASQWQVSGQRIEQHSELAKAHQLHGQYVVVYNY  
DFA---GLTTQVVEDAGKWQVPGQIEQHLSDLAKAHQLHGQYVVVYNY  
DFT---SLTAQVISEDASKWQVPGQIEQHLSDLAKAHQLHGQYVVVYNY  
DFS---NSQPIVNLVSDADGWQPDQIEQHLKLNKAHQLHGQYVVVYNY  
DFA---SLTAQVVEDASKWQVPGQIEQHLNDLAKAHQLHGQYVVVYNY  
DFS---NLTTQVVEDASKWQVPGYSIEQHLSDLAKAHQLHGQYVVVYNY  
DFTGQLNQTPKVVAVDAS----KQQIEQHLSELAKAHQLHGQYVVVYNY  
NFS---TLTADVikedASKWQVPGQIEQHLSDLAKAHQLHGQYVVVYNY  
NFS---AQTADVVEDASKWQVSGQIEQHLKDLAKAHQLHGQYVVVYNY  
DFD---KKTTFPIEEDGAKYQGGSQLKEHLDDLNDKHLAAELIVVNEY  
DFA---NKTTFPIKEDGKYQGGSQLTDHLNDLSDKHLGTALIVVDKY  
DPE---NSRYQITSEDASSWQN-AEQLHQHIQSEVAKHHLDSAFVAVENF  
: \* . : :\*.. \* \* :\*::

Ps.c.aureofaciensAFD97973.1  
Ps.chlororaphisAFD97974.1  
Ps.protegensABY91230.1  
Ph.l.laumondiiNP\_931332.1  
Ph.luminescensAAM88787.1  
Ph.a.asymbioticaYP\_003042199.1  
Ph.luminescensMcf2AAR21118.1  
Ph.l.laumondiiMcf2NP\_930360.1  
Ph.temperataWP\_023045049  
X.szentirmaiMcf2CDL84642  
X.nematophilaMcf2YP\_003712268.  
E.g.inebrians  
E.t.poa  
V.tubiashiiEIF01430.1

RHEGR--NVGRAFYDVANKRMLFTDT-QVEQAR-NAQLGAVIGEHAYFVD  
SHEGR--NVGRAFYDVAKDRMLFTDT-QVEQAR-NAQLGAVIGEHAYFVD  
KHGER--NVGRAYEYVAKDRMLFTDQVQ--ARNAQFGAVIGEHAYFVD  
SHNGR--DVGRAFYDVGKERMLFTNT-THEQTR-HAQLGAVMGDHYFYD  
RHQGR--DVGRAFYDVTKDRMLFTDT-TNEQAK-RAQLGAVMGDYAYFYD  
RHNGR--DVGRAFYDVVKDRMLFTDT-SQKQAR-HAQLGAVIGDYAYFYD  
SHNGR--DVGRAFYDVTNKRMLFTDT-THEQTK-HAQLGAVMGNHAYFYD  
RYNER--NVGRAFYDVAKDRMLFTDT-PHKQAR-HAQLGAVMGDHYFYD  
RHYG-----RAFYDVAKDRMLFTDT-SQEAK-HAQLGAVIGDHYFYD  
SHNGH--DVQAFYDVAKDRMLFTDT-TQEAK-HAQLGAVMGDHYFYD  
KHNGR--DVQAFYDVAKERMIFDT-TQEAKHHAQLGAVMGDHYFYD  
TTPAG-QSVGRAFYEPTNKRLLYTIDAPEELTKSVQVGVLTAGGKVFYFN  
TTPAG-QSVGRAFYEPTSKRLLYTIDAPEELTNSAQVGVLTAGGKVFYFN  
VPQDQDHSVGLAYYQVDQQRFIYTPSPAHSDFLSDAKLVAQTGDLAWFNK  
\*:\*: ..\*::\* . :\* .

Ps.c.aureofaciensAFD97973.1  
Ps.chlororaphisAFD97974.1  
Ps.protegensABY91230.1  
Ph.l.laumondiiNP\_931332.1  
Ph.luminescensAAM88787.1  
Ph.a.asymbioticaYP\_003042199.1  
Ph.luminescensMcf2AAR21118.1  
Ph.l.laumondiiMcf2NP\_930360.1  
Ph.temperataWP\_023045049

AENAAWRVEIATGKVDQFAPS-LNQSAG--RISRFWQEGE-AVYLARR  
AENAAWRVEIATGKVDQFAPS-FNQSAG--RISRFWQEGD-AVYLARR  
AENAAWRVDIASGKVDQFAPA-FNQSAG--QISRFWQEGD-AVYLARR  
ADNAAWRVDIATGQVDAQFEPW-FNQAG--QISRLWQEGD-AVYLARR  
ADNAAWRVDIATGQVDAQFEPW-FNQAG--HISRFWQEGD-VVYLARR  
ADNAVAVRVDIATGQVDAQFELW-FNQCDG--KISRLWQEGD-AVYLARR  
ADNAAWRVDIATGQIDAQFEPW-FNQSAG--QISRLWQEGD-AVYLARR  
ADNAAWRVDIATGQVDAQFEPW-FNQSAG--QICRLWQEGN-AVYLARR  
ADNAVAVRVDIATGQVDAQFEPW-FNRNAG--NISRFWQEGD-VVYLARR

X.szentirmaiMcf2CDL84642  
X.nematophilaMcf2YP\_003712268.  
E.g.inebrians  
E.t.poae  
V.tubiashiiEIF01430.1

Ps.c.aureofaciensAFD97973.1  
Ps.chlororaphisAFD97974.1  
Ps.protegensABY91230.1  
Ph.l.laumondiiNP\_931332.1  
Ph.luminescensAAM88787.1  
Ph.a.asymbioticaYP\_003042199.1  
Ph.luminescensMcf2AAR21118.1  
Ph.l.laumondiiMcf2NP\_930360.1  
Ph.temperataWP\_023045049  
X.szentirmaiMcf2CDL84642  
X.nematophilaMcf2YP\_003712268.  
E.g.inebrians  
E.t.poae  
V.tubiashiiEIF01430.1

Ps.c.aureofaciensAFD97973.1  
Ps.chlororaphisAFD97974.1  
Ps.protegensABY91230.1  
Ph.l.laumondiiNP\_931332.1  
Ph.luminescensAAM88787.1  
Ph.a.asymbioticaYP\_003042199.1  
Ph.luminescensMcf2AAR21118.1  
Ph.l.laumondiiMcf2NP\_930360.1  
Ph.temperataWP\_023045049  
X.szentirmaiMcf2CDL84642  
X.nematophilaMcf2YP\_003712268.  
E.g.inebrians  
E.t.poae  
V.tubiashiiEIF01430.1

Ps.c.aureofaciensAFD97973.1  
Ps.chlororaphisAFD97974.1  
Ps.protegensABY91230.1  
Ph.l.laumondiiNP\_931332.1  
Ph.luminescensAAM88787.1  
Ph.a.asymbioticaYP\_003042199.1  
Ph.luminescensMcf2AAR21118.1  
Ph.l.laumondiiMcf2NP\_930360.1  
Ph.temperataWP\_023045049  
X.szentirmaiMcf2CDL84642  
X.nematophilaMcf2YP\_003712268.  
E.g.inebrians  
E.t.poae  
V.tubiashiiEIF01430.1

Ps.c.aureofaciensAFD97973.1  
Ps.chlororaphisAFD97974.1  
Ps.protegensABY91230.1  
Ph.l.laumondiiNP\_931332.1  
Ph.luminescensAAM88787.1  
Ph.a.asymbioticaYP\_003042199.1  
Ph.luminescensMcf2AAR21118.1

ADNAAAWRVDIATGQVDAQFMPW-FNHAG--KISRLWQEGN-AVYLARH  
ANNAVAWRVEIATGQVDAQFMPW-FNYNAG--KISRLWQEGD-AVYLARH  
TEHCAIWRVDVSTGVCEVKYHALCPSNKI---TLQRVWADADNHIHAVFL  
TEHSAIWRVDVSTGVCEAKYHALCPFSKR---TLQRVWVDADNQIHALFR  
DN--QVWLVNIAESRIVAQYRAFQWDYAHG-KAASRVWQENQ-RLYWSIE  
: \* \*::: . .:: \*.\* : : ::

YQLKERE-----AELNFRILGDRME  
YQLKERE-----AELNFRIGDRME  
YQLKE-R-----EAELSFIRILGDRME  
YRLKEKE-----AELEKEAELCYRILSDRME  
YRLKERE-----AELGYRIIGDRME  
YWLKVKQEPEKRLLEEQLKDWPEEQAEELLKQRPEKRGAEELGYKILGDRME  
YQLKGKE-----AELSYRLLGDRME  
YQLKGKE-----AELSYRLLGDRME  
YQLKERE-----SELSYQILGDRME  
YQLKERA-----AELGYRIVGDRME  
YQLKERE-----AELSYRIVGDRME  
HQLSEDFYFG-----HLNYILTADSMN  
HQLSENHFG-----TLNYILTADSMN  
QQTNAGH-----PAKWTVLDENSMK  
: : : \*:

LVGVVGGDALLQ-LSARTDQH---GDALKTLLQGYQSQATQRATPVYS-  
LVGVVGGDALLQ-LSARTGQH---GDALKMLQGYESQATQRATPVYS-  
LVGVVGGDESLQ-LSASNSQHGDAKTLLNLTLLKGYEQATQRATPVYS-  
LVSavgdDALLQ-LLARTSQH---SDVLKAILQGYESKSIQRETPMYT-  
LVSavgdDALLQ-LSARIGRH---GDELEAILQGYRSNSTQRGTLMYT-  
LVSavgdDALLQ-LSAGTNRH---NDELQVIRKGYESDGIKRPKTPTYT-  
LVSavgdDALLQ-LSARTGRH---GDELKTLQGYESNSTQRETPTYM-  
LVSavgdDALLQ-LSARTGLH---SDELKTLQGYENNSIQRETPMYT-  
LVSavgdDALLR-FSARTDRH---NDELKVMLQDYESNSTQRTVPMYT-  
LVSavgdHELLQ-QLANTDRH---GDVLGAIKQSYESNSTRGEISTYT-  
LVSavgSDEVLQ-HLASTDQH---ADALDTLLESYENNSTQGVISAYT-  
LVSMAGSPALLEKLNGLDKWTG----EATLLED-YTDTREVMMLHNP  
LVGMVGGPALLAKLHQEDKWTG----EVRLLLEDYTGPESELLPKLKL  
LVDVNGDLQLDNLMADTAPN----RATTNYFFQSFQAG-VEGEIDLR--  
\*\*.\*.: : : .

----LGAPMMEPSAAALVTVFGLDSAK--VAHRYWVRTSDG-----  
----LGAPMMEPSAAALVTVFGLDNAK--VAHRYWVRTSDG-----  
----LGAPVLEPTAAELITVFGDNAK--VAHRYWVRTSDG-----  
----LGTRLLQPTSAALVTVFGVDAAG--VAHRYWVRTSDG-----  
----LGARLIQPTSAALVTVFGVDAAG--VPHRYWVRTSDG-----  
----LGARLIQPTSAELITVFGDAAN--VPHRYWVRTSDR-----  
----LGARLIQPTSAALVTVFGVDTAG--VAHRYWVRTSDG-----  
----LGARLIQPTSAALVTVFGVDAAG--VAHRYWVRTSDG-----  
----LSARLIKPTSAALVTVFGVDAAN--VPHRYWVRTSDG-----  
----LGTQQVQPTGADLITVFGVDAAN--VKHRYWVRTSDG-----  
----LGTQRIKPTSAALITVFGIDAND--VKHRYWVRTSDG-----  
GS-LAGADIDAIDSHMILVLGPKPDESIIHHRFWIRMSDR-----  
ES-LAGADIDAIDPHLIFVLGPKGKDHYFYHQFWIRMSDR-----  
----ADRWIEASLSDVISVS-ANKQG--QKHRYWVLAEQ-----  
. . . : \* . \*::: :

---TVIKPNLAPPAGQPPVDAQGKQSAWIPADLVFAGSMPQPAG--Q  
---TVIKPNLAPPAGQPPVDAQGKQSAWIPADLVFAGSMPQPAG--Q  
---IVIKPNLAPPAGQAPRADAPGQAQSAWIPADLVLAGSQAQPGG--Q  
---TLIKPNLAPPADQTPHFKEQTRSAWIPADLVLAGSMPQPAG--K  
---TLIKPNLAPPADQTLHFEAHEQTRSAWIPADLVLAGSMPPLGG--K  
---TLIKPNLAPPADQAWNLKEGKQTRSAWIPADLVLAGSMPQPAG--K  
---TLIKPNLAPPADWTLHFEAHEQTRSAWIPADLVLAGSIPRAG--T

Ph.l.laumondiiMcf2NP\_930360.1  
Ph.temperataWP\_023045049  
X.szentirmaiMcf2CDL84642  
X.nematophilaMcf2YP\_003712268.  
E.g.inebrians  
E.t.poeae  
V.tubiashiiEIF01430.1

---TLIKPNLAPPADRTLHFEAHEQAHSAWPIPADLVLGSMPPQGGKEV  
---TLIKPNLALPADKPRYFKEHEQTRSASWEIPVDLVLGSIIPQPGD--K  
---TLIKPNLAPPADNTLSLEELKQARSHWQIPADLVLGSIITPAG--K  
---TLIKPNLAPPADNTLYFEAHKQTRSNNWQIPADLVLGSIIFDLG--K  
---TVIKAHP-----DIHLDYLLVGLNSTDGS-G  
---TVIKPHP-----DIHLNLYLVGTIASTGDS-G  
-----RGDLG-----VIHANLNTQ-----PDDLILALVQNKGET--D

: . : ::.

Ps.c.aureofaciensAFD97973.1  
Ps.chlororaphisAFD97974.1  
Ps.protegensABY91230.1  
Ph.l.laumondiiNP\_931332.1  
Ph.luminescensAAM88787.1  
Ph.a.asymbioticaYP\_003042199.1  
Ph.luminescensMcf2AAR21118.1  
Ph.l.laumondiiMcf2NP\_930360.1  
Ph.temperataWP\_023045049  
X.szentirmaiMcf2CDL84642  
X.nematophilaMcf2YP\_003712268.  
E.g.inebrians  
E.t.poeae  
V.tubiashiiEIF01430.1

EVFFFYSQKQKVLFRQEGPGQKVLGDSQPSALRLATPTLANVLELNGHLL  
EVFFFYSQKEKVLFRQEGPGQKVLGDSQPSALRLATPTLANVLELNGHLV  
EVFFFYSKAQQVLFQEGPGQKVLDAQGPSALRLSTPPLANVNLNGHLL  
EVFFFYSKEQKVLFRQEGPGQAVLDASHPTALRISTPALANLVNLSGSL  
EVFFFYSKEQKTLFRQEGPGQEVLDANQPSALRVTPALTNVINLNGHLV  
EVFFFYSKKEKALFRQEGPGQAVLDASQPSALRVTPALSNVINVNGHLI  
EVFFFYSKEQKALFRQEGPGQTVLDANHPSALRISTPELANLVNLSGSL  
EVFFFYSKEQKVLFRQEGPGQVLDANHPSALRINTPALANLVNLSGSL  
EVFFFYSREQKALFRQEGPGQAVLNANQPSALRVTPALANVINVNGHLI  
EVFFFYSHEQKVLFRQEGPGQTELDASHPTALRVSTPPLANVVNLSGSL  
EVFFFYSNELKLLFRQEGSGQTVLDASHPTALRVSTPSLANVVNLSGSL  
EQFCFFSHKEHKLVIQQGNGKQAKE-PRPVTMSSEFGTISNFFCVNNSLL  
LIFCFFSYNHKLVVQRNGTQAEK-PRPVTISPGLTISNFFSANNLNF  
QHYFFYSHSQQRLYYQASNRSQARSVSLP----EFSGLLRNVLDNQHLF

: : \* : \* \* . . \* : \* . : \*

Ps.c.aureofaciensAFD97973.1  
Ps.chlororaphisAFD97974.1  
Ps.protegensABY91230.1  
Ph.l.laumondiiNP\_931332.1  
Ph.luminescensAAM88787.1  
Ph.a.asymbioticaYP\_003042199.1  
Ph.luminescensMcf2AAR21118.1  
Ph.l.laumondiiMcf2NP\_930360.1  
Ph.temperataWP\_023045049  
X.szentirmaiMcf2CDL84642  
X.nematophilaMcf2YP\_003712268.  
E.g.inebrians  
E.t.poeae  
V.tubiashiiEIF01430.1

AVTEDGRVARIATGRLSYEAVNEHWLKGRST-----WWQDLAS-VNGS  
AVTEDGRVARIATGRLSYEAVNEHWLKGRST-----WWKDLAS-VNGS  
AVTNDGRMARIATGRLSYEAVNEHWLKAHSN-----WWKNLAE-VAGS  
AITEDGRVARLDALGQLNYEAVNEHWLKGRTH-----WWQDLAS-VADG  
VVTEDGRVARLDALGQLSYAAVNEHWLKGRIH-----WWQDLTS-VTDG  
AITEDGYVARLDAQQLNYAAVNEHWLKKHIH-----WWQDLAG-VAGF  
AITEDGRVARLDAQQLNYEAVNEHWLKGRTH-----WWRDLAN-ITD-  
AITEDGRVARLDAQQLNYEAVNEHWLKGRTH-----WWQDLAN-ITDS  
AMTEDGCAQLDALGQLSYGAVNEHWLKRTH-----WWKDLAD-VTGF  
AITEDGRVAQLNASGQLNYEAVNEHWLKERH-----WWQDLAG-VAGS  
AITKDGRAQLNAQGQLNYEAVNEHWLKGHPQ-----WWQDLAS-VTGS  
SITTTGFI LRLTTHYTLALEAVNHQWLEHFEKDVDG-PWWTALPKLAKDH  
SITDAGFILRLTTHCTLALAVNHQWLEHREKVDVGGPWWTALSKLAKDH  
AIANDQTLWLADQTPRL--AGVTSHWLQSHHQVLP--QLKALSEKAAAK

: : \* . \* . : \* : \*

Ps.c.aureofaciensAFD97973.1  
Ps.chlororaphisAFD97974.1  
Ps.protegensABY91230.1  
Ph.l.laumondiiNP\_931332.1  
Ph.luminescensAAM88787.1  
Ph.a.asymbioticaYP\_003042199.1  
Ph.luminescensMcf2AAR21118.1  
Ph.l.laumondiiMcf2NP\_930360.1  
Ph.temperataWP\_023045049  
X.szentirmaiMcf2CDL84642  
X.nematophilaMcf2YP\_003712268.  
E.g.inebrians  
E.t.poeae  
V.tubiashiiEIF01430.1

N-ATLAVFGAKAADGKSALPVWYHN--GQVVVAASSLQGKPLQFLGFDSA  
N-ATLAVFGAKAADGKSALPVWYHN--GQVIVAASSLQGKPLQFLGFDSA  
N-ATLAVFGVKAADGKSALPVWYHN--GQVVVASSLQGKPLQFLGFDSA  
R-ATLAVFGIKGTDGKSLLPVWYHK--GQVIVASAPLQDKRLQFLGFQVD  
R-ATLAVFGVKDTDGKSLLPVWYHN--GQVVVASAALQDKHPQFLGFQVD  
R-ATLAVFGVKGTDGKSLLPVWYHN--GQVVVASAALQDKHLQFLGFQVD  
T-TTLAVFGIKGSDGKSLLPVWYHN--GQVVVASAALSDKSLQFLGFQVD  
T-TTLAVFGVKGTDGKSLLPVWYHN--GQVVVASAALQGKSLQFLGFQVD  
S-ATLAVFGVKGADGKSLLPVWYHN--GQVVVAS--LQDKHLQFLGFQVD  
G-ATLAVFGVKGTDGKSLLPVWYHN--GQVVVASAALQGKPLQFLGFQVD  
G-ATLAVFGVKGTDGKSLLPVWYHN--GQVVVASAALQGKSLQFLGFQVD  
AAATVSIIVGLCDAGSPVQAWLCS---GRFVVAGPSLRGKPRHIAAGLTEG  
GAAIVSIIVGLSDAEGSPVQAWLCS---DRFVVAGPSLRGKPRHMAAGLTEG  
L-AQLVLLGMTDSQGE-TVNLWYDNQSATLIRAGSNLNGQHLNGLTAD

: : : \* : . . . : \* . \* : : \*

Ps.c.aureofaciensAFD97973.1  
Ps.chlororaphisAFD97974.1  
Ps.protegensABY91230.1  
Ph.l.laumondiiNP\_931332.1  
Ph.luminescensAAM88787.1

SSSARLFEPESG-----KL YLQAPMTSEALATA  
SSSARLFEPESG-----KL YLQAPMTPEALAAA  
SASARLFEPESG-----KL YLQPPMTAQALATA  
GSGARLFEPASG-----KL YRQPPMTADALAAA  
GSSARLFEPASG-----KL YRQPPMTADALAAA

Ph.a.asymbioticaYP\_003042199.1  
Ph.luminescensMcf2AAR21118.1  
Ph.l.laumondiiMcf2NP\_930360.1  
Ph.temperataWP\_023045049  
X.szentirmaiMcf2CDL84642  
X.nematophilaMcf2YP\_003712268.  
E.g.inebrians  
E.t.poae  
V.tubiashiiEIF01430.1

Ps.c.aureofaciensAFD97973.1  
Ps.chlororaphisAFD97974.1  
Ps.protegensABY91230.1  
Ph.l.laumondiiNP\_931332.1  
Ph.luminescensAAM88787.1  
Ph.a.asymbioticaYP\_003042199.1  
Ph.luminescensMcf2AAR21118.1  
Ph.l.laumondiiMcf2NP\_930360.1  
Ph.temperataWP\_023045049  
X.szentirmaiMcf2CDL84642  
X.nematophilaMcf2YP\_003712268.  
E.g.inebrians  
E.t.poae  
V.tubiashiiEIF01430.1

Ps.c.aureofaciensAFD97973.1  
Ps.chlororaphisAFD97974.1  
Ps.protegensABY91230.1  
Ph.l.laumondiiNP\_931332.1  
Ph.luminescensAAM88787.1  
Ph.a.asymbioticaYP\_003042199.1  
Ph.luminescensMcf2AAR21118.1  
Ph.l.laumondiiMcf2NP\_930360.1  
Ph.temperataWP\_023045049  
X.szentirmaiMcf2CDL84642  
X.nematophilaMcf2YP\_003712268.  
E.g.inebrians  
E.t.poae  
V.tubiashiiEIF01430.1

Ps.c.aureofaciensAFD97973.1  
Ps.chlororaphisAFD97974.1  
Ps.protegensABY91230.1  
Ph.l.laumondiiNP\_931332.1  
Ph.luminescensAAM88787.1  
Ph.a.asymbioticaYP\_003042199.1  
Ph.luminescensMcf2AAR21118.1  
Ph.l.laumondiiMcf2NP\_930360.1  
Ph.temperataWP\_023045049  
X.szentirmaiMcf2CDL84642  
X.nematophilaMcf2YP\_003712268.  
E.g.inebrians  
E.t.poae  
V.tubiashiiEIF01430.1

Ps.c.aureofaciensAFD97973.1  
Ps.chlororaphisAFD97974.1  
Ps.protegensABY91230.1

GSSARLFELANG-----KL YRQPPMTADALAAA  
GTSARLFEPESG-----KL YRQPAMTANALAAA  
GASARLFEPESG-----KL YRQPAMTANALAAA  
GSSARLFEPASG-----KL YLQPPMTADALAAA  
STSARFFEPESG-----KL YYQPAMTASELAAA  
GTSARLFEPESG-----KL YHQPAMTANALAVA  
GTKAWLWYIESKGSGLHLEVEPIVRVQLETVDSGHL YAQPTVRDEELETV  
GSKAWLWHMETE-----DSGHL YAQPTVRGKELETV  
QQWAWLYNHDDA-----SL YRQAVVNDLIL--  
\* :: \*\* \* . : . :

FG-GDEVLEASQAQLPAATLPMPEV-QLRSVQVDAGLRLTTVQGEILLRA  
FG-GDEVLEASQAQLPAATLPMPEV-QLRSVQVDAGLRLTTVQGEVLLRT  
FG-NDEVLEASQAQLPAAIDWMPKL-QLRSVQVDAGLRLTTVQGEVLLRS  
FG-TDEVLEVSSQLPAAGELASGL-HLKAVEQVDVGLRLTTVKGEILLQT  
FG-TDEVLEASQAQLPAANELEPEL-HLKAAEQVDAGLRLTTVKGEILLRT  
FG-SEAVLKASAQLPAVSELMPEL-HLKAAEQVDAGLRLTTVKGEILLRT  
FG-ADQVLDSSAQLPAASELTPEL-HLKAAQVDVGMRLITVKGEILLRT  
FGGTGQILSASAQLPSASELTPEL-HLKAAQVDTGMRLITVKGEILLRT  
FG-TDEVLDASAQLPAASELPEL-HLKAAEQVDAGLRLTTVKGEILLRT  
FG-SDQVLDTSQAQIPVASELTPEL-SLKEVQLVDVGMRLITTKGEILLRA  
FG-SDHVLDASAQLPVAASELTPEL-SLKEVQVDVGMRLITTKGEILLRS  
FCPKAPFVKAALPDGRSVPPELHP-FKTVALMTDGGRLRYTTKDGVLTLTSL  
FRLKAPFVNAEAVPDGRGVLVKHP-FKTVALT-EGGLRYTTKEGVLLILA  
----DDKLVLQGEVADAEQFATLAGEALTHAAWQGSLLQLSTRDGLVVELS  
: . . . . : : \* . \* : : :

NKG----DVQLVALDKGWQQHLGNLSQALAQVAEQWRAGVLTQGAES  
NSG----DVQLVAVDKGWQQHLGNLPQALAQVTAQWGAQVLTQGAES  
NNG----DVQLVAVDKGWQQARLGNLPQALATVAGQWGAQVLSLQDGD  
NDG----KLQLVAVDKGWQDNFARLPQALAEVADKWRKGVLTQGGDT  
HDG----KLQLVAVDKDWQDNVRLSQALAEVAGQWRVKGVLTQGGDT  
NDG----KLQLVAVDKDWQVNLARLPQALAEVAGQWPTKGVLTQGDDES  
NNG----ELQLVGVDKGWQNNLAQLSQALTKLADQWQAKGILTQDNKE  
NNG----ELQLVGVDKGWRQNNLTHLPQALAKLADQWQAKGILTQDNKE  
NGG----KLQLVAVDKGWQDNRTHLPQALAKVAGQWHTKGVLTQDDGI  
NNG----KLQLTGVDEVWQSNKTDQQAQALSELASQWHAQALTLQSHNT  
NNG----KLQLVGVDKAWLQNNKTDQIQALTKLADQWHAEGTLTQSSSI  
SER----SARLYGVDKVWQ-QNQSDVNAALATLVNTWSHGIEVVMGSEP  
SER----SARLYGVDKVWQ-QNRSDLSGEIALTKTWDHGESVVMGSEP  
ANAGPMDKPILRVAVTMEWQTHHQ-YRHQAIDALESEYQLPKQVRLLG-SV  
. \* . : \* . : : : : : : :

LGWFDVASGRMFASTGIP-AASDLRFIGVAAESQRSAYVVSPTQVLYKV  
QGWFDVASGQMFASNGIP-AASDLRFIGVAAESQRSAYVVSPTQALYKV  
RGWFDIASGQMFASNGIP-GGSDLRFIGVAAAGTPNSAYVVSPTAQALYQV  
QGWFDVSGQVFSYGSIQ-AKDNLRFIGIAAG-KKGAYVVSPTDQALYRV  
QGWFDVSGQVFSIGGIP-ATDNLRFIGIAGV-KKGAYVYNPTDQMLYQV  
RGWFDVDSGQLFSVGGILAAADNLRVFGVDAG-KKGAYVVSPTDQALYRI  
PGWFDIGSGQIFSGNGIP-VSDNLRVFGIAAG-EKAAYVVSPTTQALYQI  
LGWFDIGSGQVFSNGIP-VSHNLRVFGIAAG-EKAAYVVSPTTQALYQI  
QGWFDVSGQVFSLGGIP-AADNLRVFGIAGV-KKGAYVVSPTDQTYLWI  
PSWFDVSGQVFSVNGIR-TSDHLSFVIGADAK-NKTAYVYDQTNQKLYCL  
PSWFDIGSGQIFAGNEIP-ASDHLFVGTNAK-NKTAYVYNQTTQELYQL  
PQWYLTSSGKILAAATNATFTWLDAPTWLGADLSGAKGYAYVSAHRKIYEL  
PQWYLTSSGNIVSAAKATFTWLDAPTWLGADPSGARGYAYVAGQGRIYEL  
PSWYLVHESGRVTAPGLD-VQHNLTYLQSVDDGD--YVFDVAQTYLQQ  
\* : \*\* . . . \* : : \*

KEGAAQKLGHYANVERIG-SSLLLQGG--DGRQDELAP---PLIAGLDSV  
KQGAAQKLGHYGDVERIG-SSLLLQGGVGGRRQDELAP---PLIAGVDSV  
KDGKALQLGHYANVERIG-SSLLLQGASGNARQDDLAP---PLIAGVDSV

Ph.l.laumondiiNP\_931332.1  
Ph.luminescensAAM88787.1  
Ph.a.asymbioticaYP\_003042199.1  
Ph.luminescensMcf2AAR21118.1  
Ph.l.laumondiiMcf2NP\_930360.1  
Ph.temperataWP\_023045049  
X.szentirmaiiMcf2CDL84642  
X.nematophilaMcf2YP\_003712268.  
E.g.inebrians  
E.t.poe  
V.tubiashiiEIF01430.1

KDSVQKLNHYTSVERIG-SSLLIRGGGTGRRDDLTP---PLITGVDSV  
KESGAQKLNHYADVERIG-SSLLLQDG----GKGDLSP---MLIAGVDSV  
QGGGV---HYTSVERIG-SSLLLQGGEMSGRQDELTP---PLIAGVDSV  
KDGNAQMLNKFTAVERIG-SSLLLQGGVGGSKDDLTP---PIIAGVDSV  
KDGNAQMLNKFTGVERIG-SSLLLQGGVGGSKDDLTP---PLIDGVDSV  
KDGGVQKINHYTSVERIG-SSLLLQGG---WGQDDLTP---PLIVGVDSV  
NDDKTLTINKLNDVERIN-SSLLLQGG---EADDNLTP---PLIDGVDSL  
NNYKDKILNKINGVERVN-SSLLLQGG---RSADTLMP---PIIDGVDSL  
RQSSAEET-SAASREDAFASRLHDVLAPEVSPGASFRP---FALENVLYT  
GEGSAEEKKSAASQEVAFASRFQDVLAVKPSPGASFRQ---FALENVHYT  
HLTDHSPLGHFSMALTEGGTHLVLQGS---EGSKIQT---LPRKGVRSL  
: : . : :

Ps.c.aureofaciensAFD97973.1  
Ps.chlororaphisAFD97974.1  
Ps.protegensABY91230.1  
Ph.l.laumondiiNP\_931332.1  
Ph.luminescensAAM88787.1  
Ph.a.asymbioticaYP\_003042199.1  
Ph.luminescensMcf2AAR21118.1  
Ph.l.laumondiiMcf2NP\_930360.1  
Ph.temperataWP\_023045049  
X.szentirmaiiMcf2CDL84642  
X.nematophilaMcf2YP\_003712268.  
E.g.inebrians  
E.t.poe  
V.tubiashiiEIF01430.1

VLH---GGGASDITYRFSAMWAHYRTVVIDNDDPG-QALDRLILPVADGK  
VLH---GGGASDITYRFSAMWAHYRTVVIDNDDPG-QALDRLILPVADGK  
VLH---GGAGDDTYRFSAMWAHYRSVVIDNDDPG-LALDRVILPVADGK  
VLH---GGADNDTYRLSQEMWSHYRTVVIDNDDPG-QALDRLIMPVDAE  
VLH---GGAGSDTYRLSQTMWSYRTVVIDNDDPN-QVLDRLIILAVDAE  
VLH---GGADSDTYRLEAMWSHYRTVVIDNDDL- QALDHLIIPVDAE  
VLH---GGADDDTYRLNKAMWSHYRTVVIDNDDRG-QALDRLILPLADPQ  
VLH---GGADNDIYRLSKAMWSHYHTVVIDNDDRS-QALDRLILPLADPE  
VLH---GGADDDTYRLSQEMWSHYRTIVIDNDDPG-QVLDRLIMLVTDAAE  
LLY---GGANHDSYNFTREAWDHYRTVVIDNNDPA-QKLDRLILPIANPE  
VLY---GGANHDYKFTKEMWDHYRTVVIDNNDPA-QALDRLILPIANPQ  
ILSQVEGDTSFMEYVIPSSSWESLDGLVVKWNDQGRVEIEGSTRHPRRAG  
ILSQVEGDTSFMDYSVPSASWESLSGLVIEWKDQGRVEMEGSTMHPGLG  
LWS---GNSRDYHSLDENDLAHYQQVLIQSHRVG-ETLK---LALENPN  
: \* . \* . : : . : :

Ps.c.aureofaciensAFD97973.1  
Ps.chlororaphisAFD97974.1  
Ps.protegensABY91230.1  
Ph.l.laumondiiNP\_931332.1  
Ph.luminescensAAM88787.1  
Ph.a.asymbioticaYP\_003042199.1  
Ph.luminescensMcf2AAR21118.1  
Ph.l.laumondiiMcf2NP\_930360.1  
Ph.temperataWP\_023045049  
X.szentirmaiiMcf2CDL84642  
X.nematophilaMcf2YP\_003712268.  
E.g.inebrians  
E.t.poe  
V.tubiashiiEIF01430.1

NILVSRGEDVLL  
NILVSRQGENVLL  
NILVSRGEDVQL  
KILVSRHEDNML  
KIFVSRHEDDLML  
KILVSRHEDDLIL  
SILVNRHDDLVL  
SILVNRDDDLML  
KILVSRHEDDLML  
SILVSHNDLML  
SILVSHNDLML  
SFLGNRLDDDLIM  
WYLAKRLGDDLII  
ALLQRRGDDLAL  
: : : : :

## Supplementary Tables

**Supplementary Table 1:** Comparison of *Epichloë* Mcf-like amino acid sequences with those of the bacterial Mcf1, FitD, and Mcf2 sequences.

| Species                                                   | Identity                          |                                  |                                  |
|-----------------------------------------------------------|-----------------------------------|----------------------------------|----------------------------------|
|                                                           | Mcf 1<br>(AAM88787.1)<br>2,929 aa | fitD<br>(AFD97974.1)<br>2,996 aa | Mcf2<br>(AAR21118.1)<br>2,388 aa |
| <i>E. amarillans</i><br>1,994 aa                          | 673/2,032 (33%)                   | 673/1,922 (35%)                  | 649/1,856 (35%)                  |
| <i>E. aotearoae</i><br>1,986 aa                           | 676/2,037 (33%)                   | 660/1,909 (35%)                  | 629/1,846 (34%)                  |
| <i>E. baconii</i><br>2,044 aa                             | 662/1,924 (34%)                   | 672/1,915 (35%)                  | 652/1,861 (35%)                  |
| <i>E. brachyelytri</i><br>1,988 aa                        | 636/1,839 (35%)                   | 658/1,912 (34%)                  | 638/1,836 (35%)                  |
| <i>E. festucae</i> 2368<br>1,844 aa                       | 619/1,883 (33%)                   | 611/1,766 (35%)                  | 631/1,881 (34%)                  |
| <i>E. festucae</i> F11<br>1,844 aa                        | 617/1,883 (33%)                   | 611/1,766 (35%)                  | 631/1,881 (34%)                  |
| <i>E. gansuensis</i> var.<br><i>inebrians</i><br>1,983 aa | 669/1,991 (34%)                   | 671/1,883 (36%)                  | 677/1,997 (34%)                  |
| <i>E. glyceriae</i><br>2,009 aa                           | 655/1,924 (34%)                   | 663/1,865 (36%)                  | 639/1,842 (35%)                  |
| <i>E. mollis</i><br>2,012 aa                              | 644/1,870 (34%)                   | 682/1,922 (35%)                  | 657/1,850 (36%)                  |
| <i>E. typhina</i> subsp.<br><i>poae</i> Ps1<br>1,997 aa   | 652/1,899 (34%)                   | 669/1,921 (35%)                  | 673/1,985 (34%)                  |
| <i>E. typhina</i> E8<br>2,004 aa                          | 673/2,023 (33%)                   | 667/1,944 (34%)                  | 660/1,955 (34%)                  |

**Supplementary Table 2:** Sources of DNA sequences used in this study.

| <b>Species</b>                                                  | <b>Source</b>                                                             |
|-----------------------------------------------------------------|---------------------------------------------------------------------------|
| <i>Aciculosporium take</i>                                      | AFQZ00000000.1                                                            |
| <i>Atkinsonella hypoxylon</i>                                   | <a href="http://www.endophyte.uky.edu/">http://www.endophyte.uky.edu/</a> |
| <i>Claviceps fusiformis</i>                                     | AFRA00000000.1                                                            |
| <i>C. paspali</i>                                               | AFRC00000000.1                                                            |
| <i>C. purpurea</i>                                              | CAGA00000000                                                              |
| <i>Metarhizium anisopliae</i>                                   | ADNJ00000000.1                                                            |
| <i>Epichloë amarillans</i>                                      | AFRF00000000.1                                                            |
| <i>E. aotearoae</i>                                             | <a href="http://www.endophyte.uky.edu/">http://www.endophyte.uky.edu/</a> |
| <i>E. baconii</i>                                               | <a href="http://www.endophyte.uky.edu/">http://www.endophyte.uky.edu/</a> |
| <i>E. brachyelytri</i>                                          | AFRB00000000.1                                                            |
| <i>E. elymi</i>                                                 | AMDJ00000000.1                                                            |
| <i>E. festucae</i> E2368                                        | ADFL00000000.2                                                            |
| <i>E. festucae</i> F11                                          | AFRX00000000.1                                                            |
| <i>E. gansuensis</i>                                            | AFRE00000000.1                                                            |
| <i>E. gansuensis</i> var. <i>inebrians</i>                      | AMDK00000000.1                                                            |
| <i>E. glyceriae</i> E277                                        | AFRG00000000.1                                                            |
| <i>E. mollis</i>                                                | <a href="http://www.endophyte.uky.edu/">http://www.endophyte.uky.edu/</a> |
| <i>E. typhina</i> E8                                            | AMDJ00000000.1                                                            |
| <i>E. typhina</i> subsp. <i>poae</i> E5819                      | AFSE00000000.1                                                            |
| <i>E. typhina</i> subsp. <i>poae</i> Ps.1                       | KJ502561 (This study)                                                     |
| <i>Photorhabdus asymbiotica</i> subsp. <i>asymbiotica</i> Mcf1  | YP_003042199                                                              |
| <i>Ph. luminescens</i> Mcf1                                     | AAM88787                                                                  |
| <i>Ph. luminescens</i> Mcf2                                     | AAR21118                                                                  |
| <i>Ph. luminescens</i> subsp. <i>laumondii</i> Mcf1             | NP_931332                                                                 |
| <i>Ph. luminescens</i> subsp. <i>laumondii</i> Mcf2             | NP_930360                                                                 |
| <i>Ph. temperata</i> Mcf1                                       | WP_023045049                                                              |
| <i>Pseudomonas chlororaphis</i> subsp. <i>aureofaciens</i> FitD | AFD97973                                                                  |
| <i>Ps. chlororaphis</i> FitD                                    | AFD97974                                                                  |
| <i>Ps. protegens</i> FitD                                       | ABY91230                                                                  |
| <i>Xenorhabdus szentirmaii</i> Mcf2                             | CDL84642                                                                  |
| <i>X. nematophila</i> Mcf2                                      | YP_003712268                                                              |
| <i>Vibrio tubiashii</i>                                         | EIF01430                                                                  |



**Supplementary Table 3:** Estimation of the divergence rate of the basal *Epichloë* spp. relative to *Atkinsonella hypoxylon*.

| <b>Gene</b>                 | <b>Length,<br/>nt</b> | <b>Species</b>                               | <b><math>K_s</math></b> | <b><math>K_a</math></b> | <b>Average<br/><math>K_s</math></b> | <b>Divergence<br/>rate</b> |                             |       |                      |       |       |       |                       |                                              |       |       |                     |       |       |      |       |                      |       |       |       |                       |                                              |       |       |                     |       |       |      |       |                      |       |       |       |                       |                                              |       |
|-----------------------------|-----------------------|----------------------------------------------|-------------------------|-------------------------|-------------------------------------|----------------------------|-----------------------------|-------|----------------------|-------|-------|-------|-----------------------|----------------------------------------------|-------|-------|---------------------|-------|-------|------|-------|----------------------|-------|-------|-------|-----------------------|----------------------------------------------|-------|-------|---------------------|-------|-------|------|-------|----------------------|-------|-------|-------|-----------------------|----------------------------------------------|-------|
| Glutamate<br>dehydrogenase  | 3,204                 | <i>E. gansuensis</i>                         | 1.290                   | 0.042                   | 1.251                               | $7.72 \times 10^{-9}$      |                             |       |                      |       |       |       |                       |                                              |       |       |                     |       |       |      |       |                      |       |       |       |                       |                                              |       |       |                     |       |       |      |       |                      |       |       |       |                       |                                              |       |
|                             |                       | <i>E. glyceriae</i>                          | 1.211                   | 0.042                   |                                     |                            | Isoleucine<br>tRNA synthase | 3,216 | <i>E. gansuensis</i> | 1.236 | 0.048 | 1.243 | $7.67 \times 10^{-9}$ | <i>E. gansuensis</i><br>var <i>inebrians</i> | 1.243 | 0.049 | <i>E. glyceriae</i> | 1.249 | 0.050 | MCM7 | 2,441 | <i>E. gansuensis</i> | 0.957 | 0.040 | 0.961 | $5.93 \times 10^{-9}$ | <i>E. gansuensis</i><br>var <i>inebrians</i> | 0.943 | 0.040 | <i>E. glyceriae</i> | 0.983 | 0.040 | TSR1 | 2,487 | <i>E. gansuensis</i> | 1.080 | 0.075 | 1.050 | $6.48 \times 10^{-9}$ | <i>E. gansuensis</i><br>var <i>inebrians</i> | 1.037 |
| Isoleucine<br>tRNA synthase | 3,216                 | <i>E. gansuensis</i>                         | 1.236                   | 0.048                   | 1.243                               | $7.67 \times 10^{-9}$      |                             |       |                      |       |       |       |                       |                                              |       |       |                     |       |       |      |       |                      |       |       |       |                       |                                              |       |       |                     |       |       |      |       |                      |       |       |       |                       |                                              |       |
|                             |                       | <i>E. gansuensis</i><br>var <i>inebrians</i> | 1.243                   | 0.049                   |                                     |                            |                             |       |                      |       |       |       |                       |                                              |       |       |                     |       |       |      |       |                      |       |       |       |                       |                                              |       |       |                     |       |       |      |       |                      |       |       |       |                       |                                              |       |
|                             |                       | <i>E. glyceriae</i>                          | 1.249                   | 0.050                   |                                     |                            | MCM7                        | 2,441 | <i>E. gansuensis</i> | 0.957 | 0.040 | 0.961 | $5.93 \times 10^{-9}$ | <i>E. gansuensis</i><br>var <i>inebrians</i> | 0.943 | 0.040 | <i>E. glyceriae</i> | 0.983 | 0.040 | TSR1 | 2,487 | <i>E. gansuensis</i> | 1.080 | 0.075 | 1.050 | $6.48 \times 10^{-9}$ | <i>E. gansuensis</i><br>var <i>inebrians</i> | 1.037 | 0.073 | <i>E. glyceriae</i> | 1.033 | 0.070 |      |       |                      |       |       |       |                       |                                              |       |
| MCM7                        | 2,441                 | <i>E. gansuensis</i>                         | 0.957                   | 0.040                   | 0.961                               | $5.93 \times 10^{-9}$      |                             |       |                      |       |       |       |                       |                                              |       |       |                     |       |       |      |       |                      |       |       |       |                       |                                              |       |       |                     |       |       |      |       |                      |       |       |       |                       |                                              |       |
|                             |                       | <i>E. gansuensis</i><br>var <i>inebrians</i> | 0.943                   | 0.040                   |                                     |                            |                             |       |                      |       |       |       |                       |                                              |       |       |                     |       |       |      |       |                      |       |       |       |                       |                                              |       |       |                     |       |       |      |       |                      |       |       |       |                       |                                              |       |
|                             |                       | <i>E. glyceriae</i>                          | 0.983                   | 0.040                   |                                     |                            | TSR1                        | 2,487 | <i>E. gansuensis</i> | 1.080 | 0.075 | 1.050 | $6.48 \times 10^{-9}$ | <i>E. gansuensis</i><br>var <i>inebrians</i> | 1.037 | 0.073 | <i>E. glyceriae</i> | 1.033 | 0.070 |      |       |                      |       |       |       |                       |                                              |       |       |                     |       |       |      |       |                      |       |       |       |                       |                                              |       |
| TSR1                        | 2,487                 | <i>E. gansuensis</i>                         | 1.080                   | 0.075                   | 1.050                               | $6.48 \times 10^{-9}$      |                             |       |                      |       |       |       |                       |                                              |       |       |                     |       |       |      |       |                      |       |       |       |                       |                                              |       |       |                     |       |       |      |       |                      |       |       |       |                       |                                              |       |
|                             |                       | <i>E. gansuensis</i><br>var <i>inebrians</i> | 1.037                   | 0.073                   |                                     |                            |                             |       |                      |       |       |       |                       |                                              |       |       |                     |       |       |      |       |                      |       |       |       |                       |                                              |       |       |                     |       |       |      |       |                      |       |       |       |                       |                                              |       |
|                             |                       | <i>E. glyceriae</i>                          | 1.033                   | 0.070                   |                                     |                            |                             |       |                      |       |       |       |                       |                                              |       |       |                     |       |       |      |       |                      |       |       |       |                       |                                              |       |       |                     |       |       |      |       |                      |       |       |       |                       |                                              |       |

**Supplementary Table 4:** Estimation of the divergence times between the basal *Epichloë* spp. and *Claviceps purpurea*.

| Gene                     | Species                                   | $K_s$ | $K_a$ | Average $K_s$ | Divergence time, Mya |
|--------------------------|-------------------------------------------|-------|-------|---------------|----------------------|
| Glutamate dehydrogenase  | <i>E. gansuensis</i>                      | 0.841 | 0.048 | 0.830         | 53.7                 |
|                          | <i>E. glyceriae</i>                       | 0.818 | 0.049 |               |                      |
| Isoleucine tRNA synthase | <i>E. gansuensis</i>                      | 0.918 | 0.058 | 0.939         | 61.2                 |
|                          | <i>E. gansuensis</i> var <i>inebrians</i> | 0.927 | 0.061 |               |                      |
|                          | <i>E. glyceriae</i>                       | 0.971 | 0.059 |               |                      |
| MCM7                     | <i>E. gansuensis</i>                      | 0.749 | 0.052 | 0.766         | 64.6                 |
|                          | <i>E. gansuensis</i> var <i>inebrians</i> | 0.786 | 0.051 |               |                      |
|                          | <i>E. glyceriae</i>                       | 0.764 | 0.052 |               |                      |
| TSR1                     | <i>E. gansuensis</i>                      | 0.735 | 0.073 | 0.720         | 55.6                 |
|                          | <i>E. gansuensis</i> var <i>inebrians</i> | 0.705 | 0.074 |               |                      |
|                          | <i>E. glyceriae</i>                       | 0.720 | 0.070 |               |                      |

Mean divergence time, Mya:  $58.8 \pm 2.5$

**Supplementary Table 5:** Estimation of the divergence time between *E. gansuensis* and *E. glyceriae*.

| <b>Gene</b>              | <b>Species</b>                               | <b><math>K_s</math></b> | <b><math>K_a</math></b> | <b>Average <math>K_s</math></b> | <b>Divergence time, Mya</b> |
|--------------------------|----------------------------------------------|-------------------------|-------------------------|---------------------------------|-----------------------------|
| Glutamate dehydrogenase  | <i>E. gansuensis</i>                         | 0.108                   | 0.017                   | 0.108                           | 6.99                        |
|                          | <i>E. gansuensis</i><br>var <i>inebrians</i> | 0.108                   | 0.011                   |                                 |                             |
| Isoleucine tRNA synthase | <i>E. gansuensis</i>                         | 0.080                   | 0.009                   | 0.080                           | 5.22                        |
|                          | <i>E. gansuensis</i><br>var <i>inebrians</i> | 0.080                   | 0.011                   |                                 |                             |
| MCM7                     | <i>E. gansuensis</i>                         | 0.117                   | 0.010                   | 0.117                           | 9.87                        |
|                          | <i>E. gansuensis</i><br>var <i>inebrians</i> | 0.117                   | 0.010                   |                                 |                             |
| TSR1                     | <i>E. gansuensis</i>                         | 0.094                   | 0.017                   | 0.087                           | 6.71                        |
|                          | <i>E. gansuensis</i><br>var <i>inebrians</i> | 0.080                   | 0.016                   |                                 |                             |

Mean divergence time, Mya:  $7.2 \pm 0.97$
